# Supplementary material for: The impact of genetic adaptation on chimpanzee subspecies differentiation
Source: PubMed Central journal article supplement (PMC6901233; doi:10.1371/journal.pgen.1008485), 2019-11-25

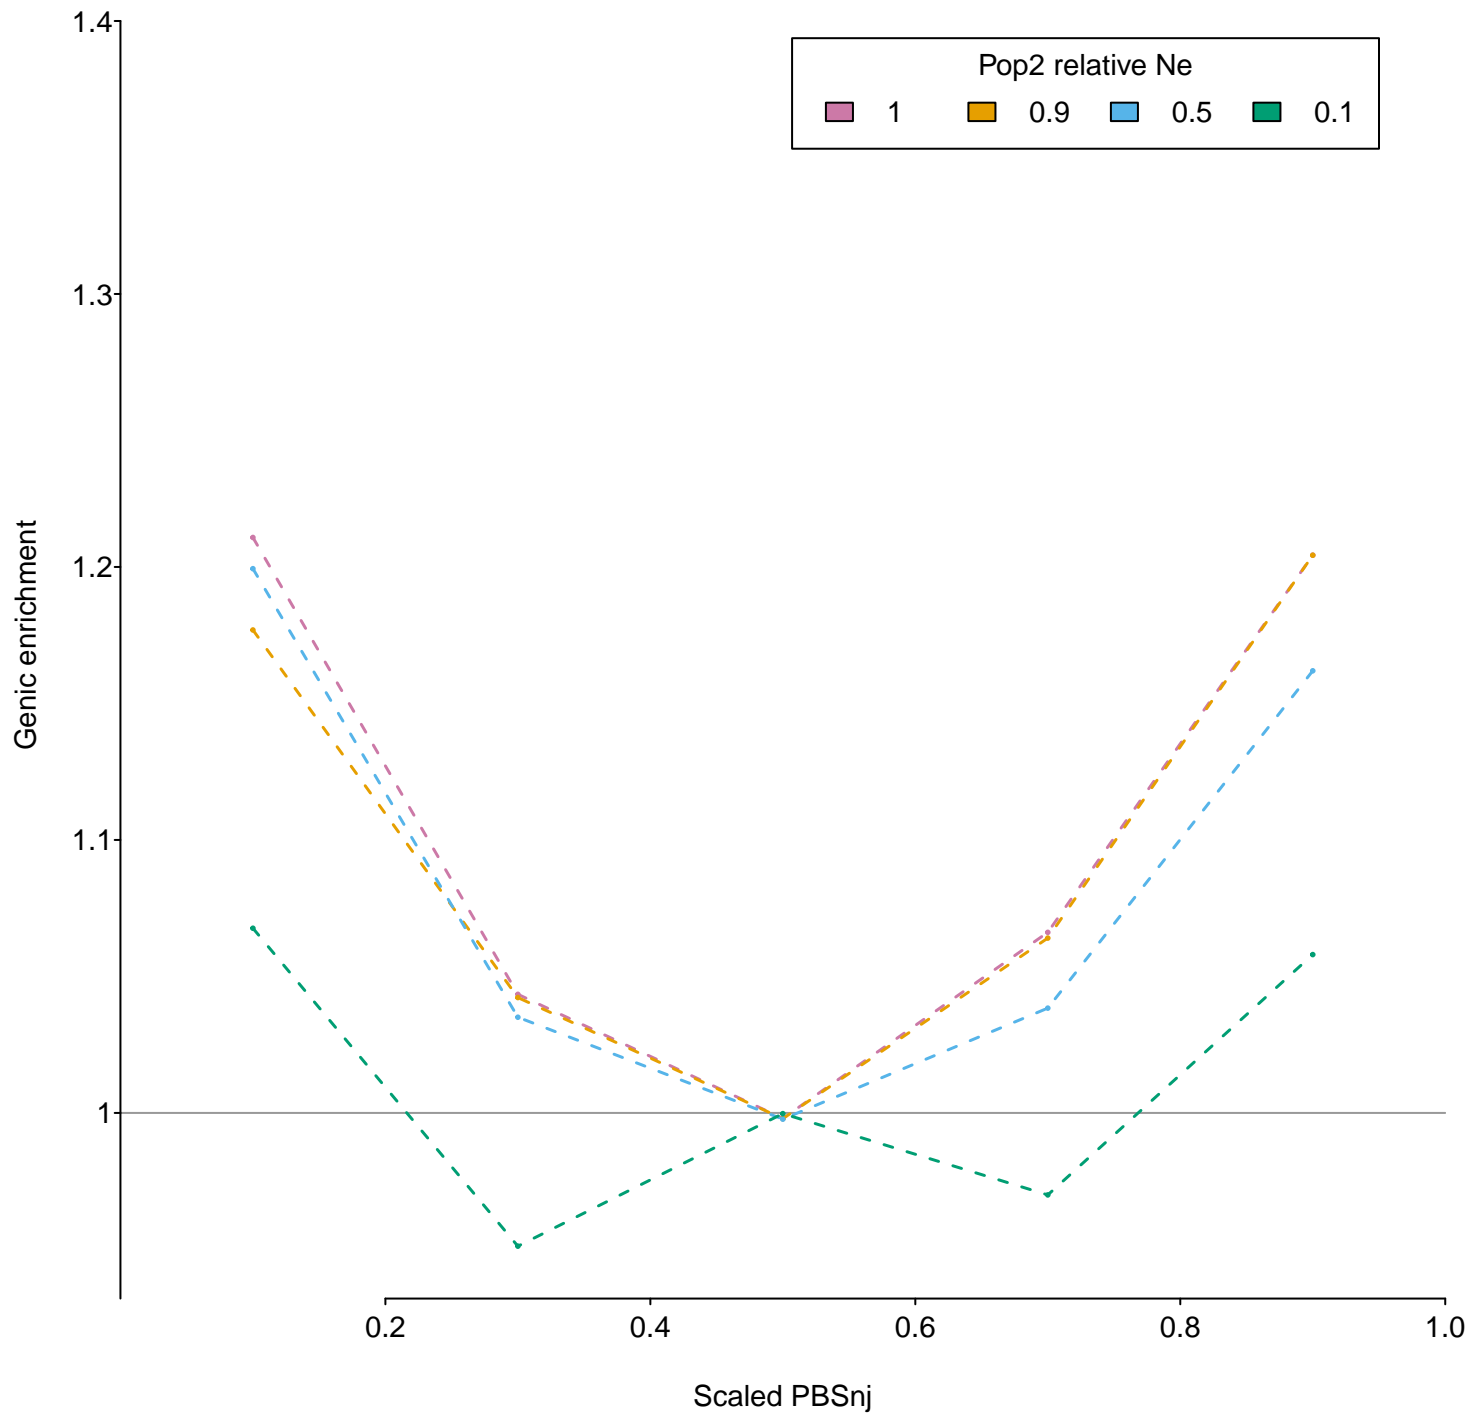

Supplement: pgen.1008485.s019.pdf [file pgen.1008485.s019.pdf]
