# Supplementary material for: The impact of genetic adaptation on chimpanzee subspecies differentiation
Source: PLoS Genet. 2019 Nov 25;15(11):e1008485. doi: 10.1371/journal.pgen.1008485 (PMC6901233; doi:10.1371/journal.pgen.1008485)
Supplement: S11 Table — (XLSX) [file pgen.1008485.s031.xlsx]

## Sheet: Supplementary File 16
S11 Table: PBSnj Central GO enrichment
Category	Average genes in category in resamples	Outlier genes in category	P-VALUE	FDR P-VALUE	Genes in category with a SNP	Total genes in category	GO Category Name	Genes
GO:0004950	0.05	3	2e-05	0.04146	19	19	chemokine receptor activity	ccr9,ccr3,cxcr6
GO:0016812	0.023	2	0.00014	0.13137	3	3	hydrolase activity, acting on carbon-nitrogen (but not peptide) bonds, in cyclic amides	cd101,cad
GO:0007614	0.478	4	0.00026	0.165555	9	9	short-term memory	brinp1,cux2,serpinf1,chrna7
GO:0050892	0.137	3	0.00032	0.165555	13	13	intestinal absorption	lep,cd36,scarb1
GO:0045666	1.545	7	0.0005	0.165555	75	75	positive regulation of neuron differentiation	brinp1,trim32,mef2c,timp2,bmp7,bmp6,tgif2
GO:0016032	5.118	14	0.00054	0.165555	377	379	viral process	snw1,scrib,ccr3,dcaf1,pacs2,zmynd11,lyn,stat1,pak2,fbxw7,mdfic,rbm15b,scarb1,cd4
GO:0043407	0.413	4	0.0006	0.165555	37	37	negative regulation of MAP kinase activity	ptprj,lyn,gba,bmp7
GO:0016493	0.033	2	0.00064	0.165555	11	11	C-C chemokine receptor activity	ccr9,ccr3
GO:0030332	0.458	4	0.00072	0.165555	22	22	cyclin binding	cdk14,fbxw7,mdfic,poln
GO:0005515	122.085	147	0.00072	0.165555	7779	7785	protein binding	snw1,znf418,mga,cubn,pmm2,rad54l2,tfb1m,pi4k2a,rptor,cmya5,sorbs2,trim54,scrib,ptprj,brinp1,fyco1,xrcc6,ccr3,trmt10c,atp6v0a2,pcsk2,dcaf1,mad1l1,myo5b,trim32,zmynd11,sh3bp2,plcb1,dtna,cdk14,trappc12,atp10a,ptpra,irak4,ptprd…
GO:0070562	0.051	2	0.00078	0.165555	3	3	regulation of vitamin D receptor signaling pathway	snw1,med1
GO:0002755	0.172	3	0.00084	0.165555	23	23	MyD88-dependent toll-like receptor signaling pathway	irak4,cd36,tab2
GO:0071300	1.167	6	0.00096	0.165555	67	67	cellular response to retinoic acid	snw1,lep,brinp1,lyn,mef2c,serpinf1
GO:0050863	0.056	2	0.00102	0.165555	8	8	regulation of T cell activation	sit1,cd4
GO:0070508	0.064	2	0.00102	0.165555	6	6	cholesterol import	cd36,scarb1
GO:0070098	0.211	3	0.00118	0.169624	63	64	chemokine-mediated signaling pathway	ccr9,ccr3,cxcr6
GO:0010008	2.689	9	0.0012	0.169624	182	183	endosome membrane	snx25,cubn,atp6v0a2,irak4,grb14,ankfy1,snx17,oca2,tab2
GO:0048471	12.112	23	0.0013	0.177087	559	560	perinuclear region of cytoplasm	cmya5,sorbs2,slc30a7,manf,lyn,stk33,prkce,itpr1,stat1,pak2,uso1,nrbp1,magi2,ctif,serpinf1,sept2,thbs3,pde9a,pi4kb,rasef,slc2a12,vps4a,vps54
GO:0060750	0.126	2	0.00162	0.192913	4	4	epithelial cell proliferation involved in mammary gland duct elongation	esr1,med1
GO:0002227	0.064	2	0.00164	0.192913	12	12	innate immune response in mucosa	pla2g1b,ltf
