# Supplementary material for: The impact of genetic adaptation on chimpanzee subspecies differentiation
Source: PLOS journal article supplement (doi:10.1371/journal.pgen.1008485), 2019-11-25

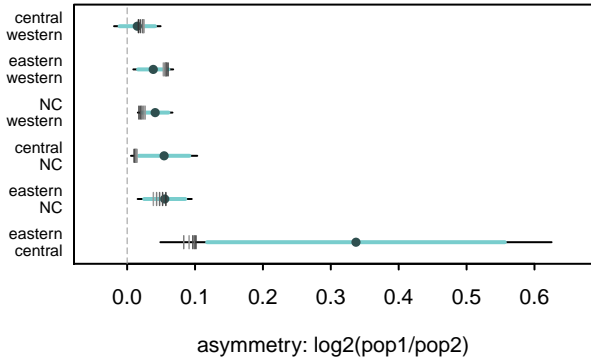

Supplement: S12 (10.1371/journal.pgen.1008485.s012) [file journal.pgen.1008485.s012]
