# Supplementary material for: The impact of genetic adaptation on chimpanzee subspecies differentiation
Source: PLOS journal article supplement (doi:10.1371/journal.pgen.1008485), 2019-11-25

**a**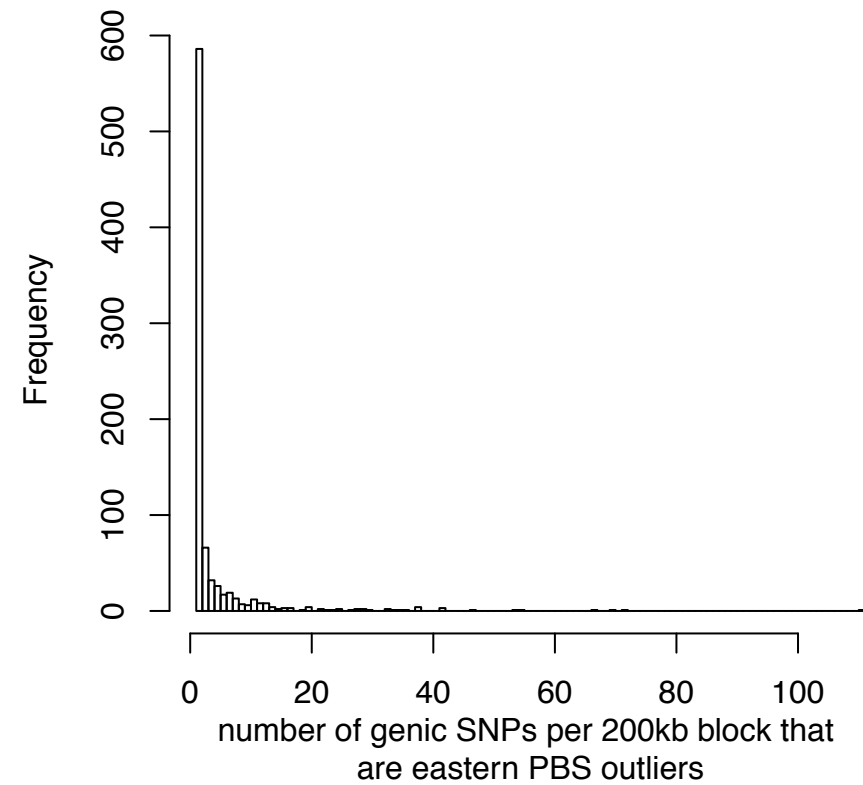**b**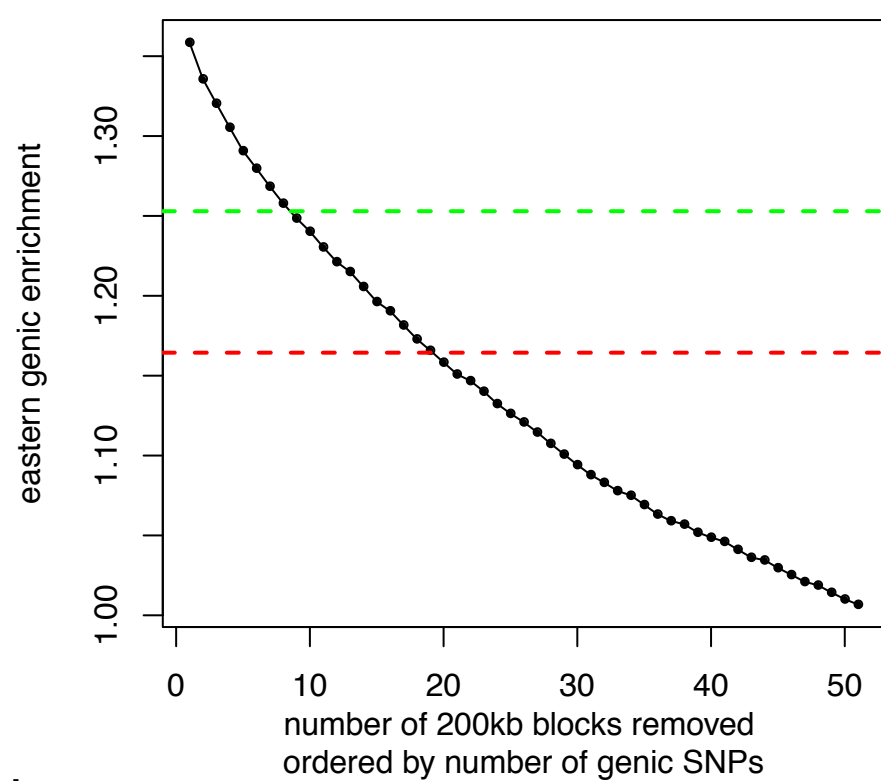**c**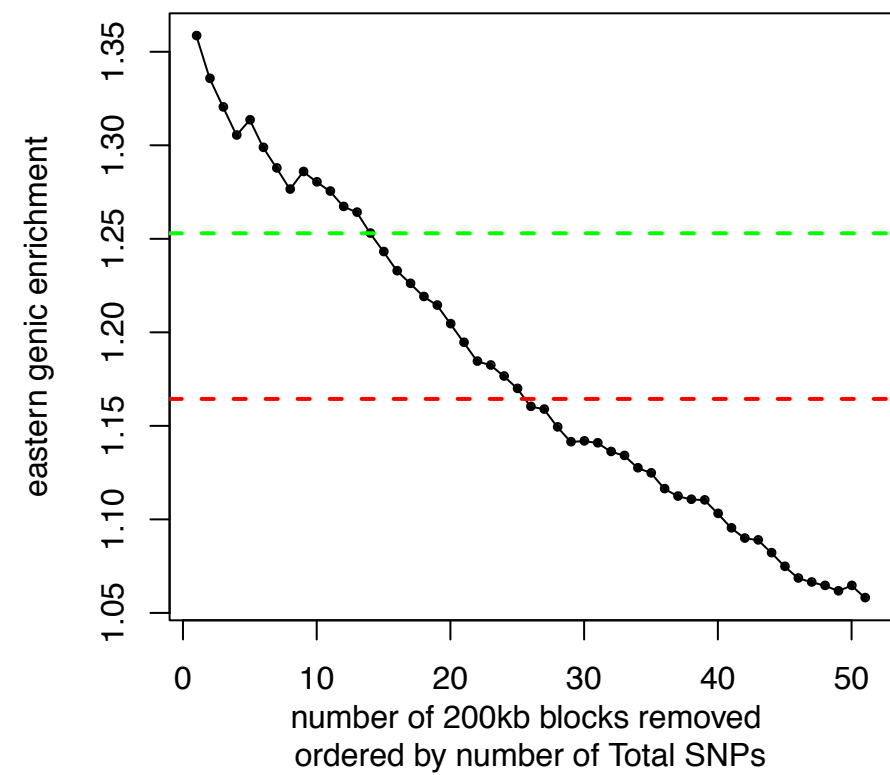**d**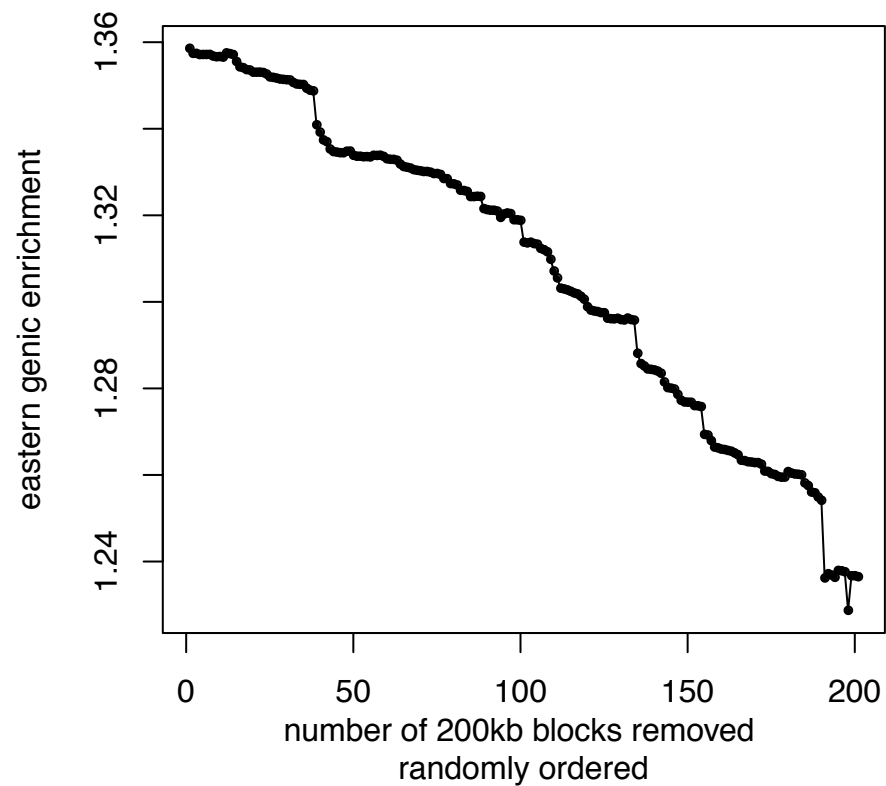

Supplement: S14 (10.1371/journal.pgen.1008485.s014) [file journal.pgen.1008485.s014]
