# Supplementary material for: The impact of genetic adaptation on chimpanzee subspecies differentiation
Source: PLOS journal article supplement (doi:10.1371/journal.pgen.1008485), 2019-11-25

**A**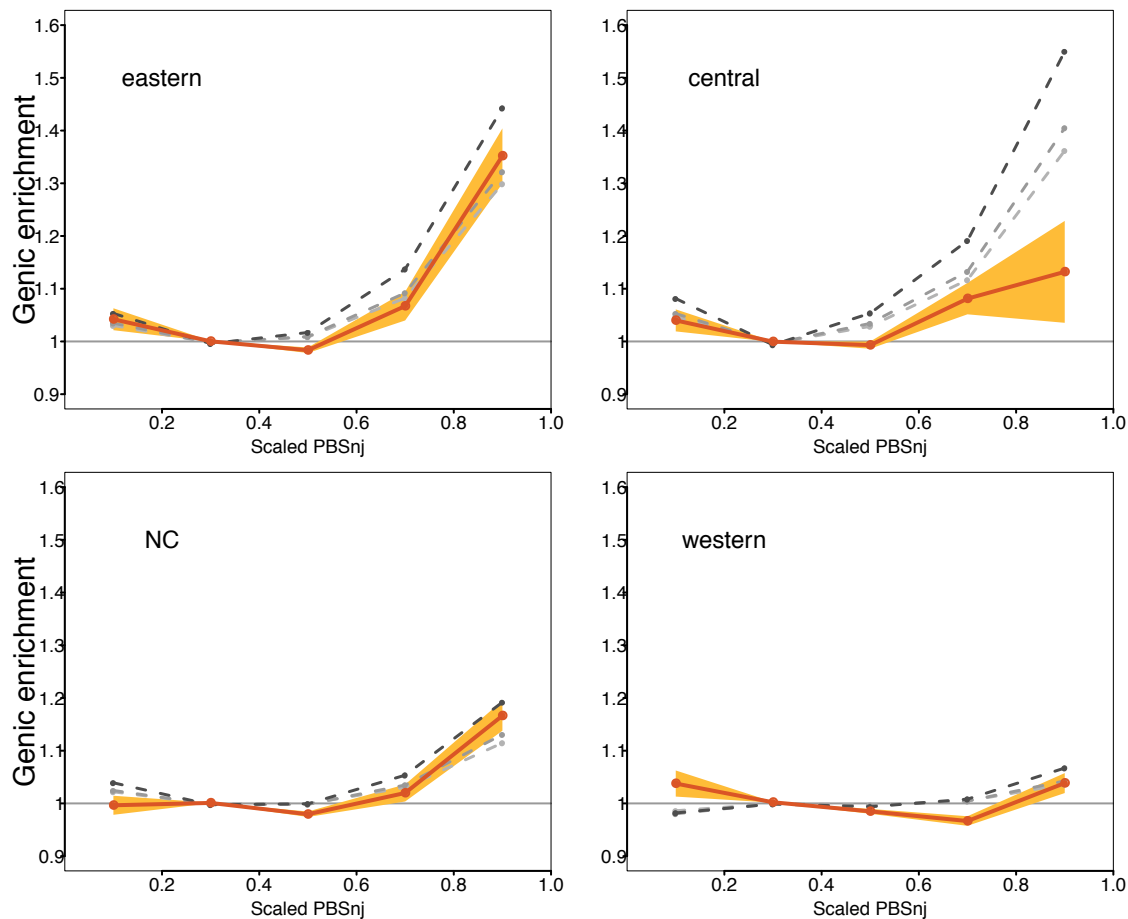**B**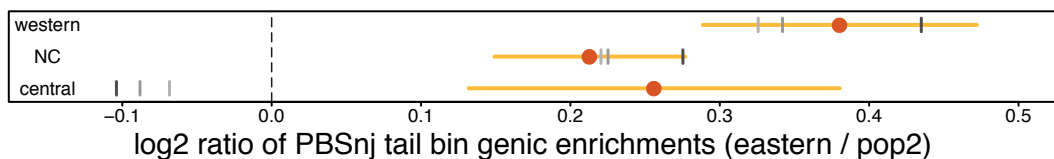

Supplement: S20 (10.1371/journal.pgen.1008485.s020) [file journal.pgen.1008485.s020]
