# Supplementary material for: The impact of genetic adaptation on chimpanzee subspecies differentiation
Source: PLoS Genet. 2019 Nov 25;15(11):e1008485. doi: 10.1371/journal.pgen.1008485 (PMC6901233; doi:10.1371/journal.pgen.1008485)
Supplement: S20 Table — (XLSX) [file pgen.1008485.s040.xlsx]

## Sheet: Supplementary file 19
S20 Table: PBSnj Eastern VIP module enrichment
Category	Average genes in category in resamples	Outlier genes in category	P-VALUE	FDR P-VALUE	Genes in category with a SNP	Total genes in category	Module	Genes
siv_modules:1	4.356	12	0.00103	0.01586	109	109	red	dpf3,stat1,stat3,lgals8,sp100,rnasel,bcl2l14,oas2,irf2,mx2,pi4k2b,col1a2
siv_modules:4	1.226	5	0.0027	0.02439	17	17	lightcyan	creb5,rtn1,hkdc1,anxa4,mef2c
siv_modules:31	5.289	12	0.00495	0.0288367	109	109	magenta	ehmt1,znf346,wbp11,dnmt3a,cd6,rab35,usp20,mbd5,shprh,ankh,myh9,glb1
siv_modules:30	5.829	10	0.0604	0.288315	85	85	tan	slc39a8,traf3ip2,zcchc14,bahd1,tcf12,cbfb,fgfr2,cacnb4,tfb1m,ankh
siv_modules:33	3.147	6	0.09204	0.3499	126	126	green	phc2,thbs3,stard10,cbx7,ogfr,isoc2
siv_modules:11	9.055	12	0.17074	0.544356	93	93	brown	fam19a4,gpc6,cntnap4,megf11,inpp5e,scin,mal,dnah8,unc5c,dst,srgap1,c8a
siv_modules:25	2.211	4	0.17827	0.544356	79	79	greenyellow	ccnb2,shcbp1,sbno1,nusap1
siv_modules:3	6.248	8	0.2697	0.695754	79	79	black	myt1l,hdac5,osbpl10,gimap7,abtb2,timp2,spag16,rexo1
siv_modules:15	1.094	2	0.29966	0.695754	26	26	paleturquoise	tnfsf13b,cd274
siv_modules:9	1.939	3	0.30026	0.695754	31	31	darkgreen	katnal1,nedd4l,cacna1i
siv_modules:14	1.52	2	0.46241	0.956231	16	16	darkorange	syt6,dst
siv_modules:5	2.566	3	0.48245	0.956231	41	41	lightyellow	dao,magi2,sipa1l2
siv_modules:7	3.582	4	0.49811	0.956231	29	29	cyan	l2hgdh,sdk1,adamtsl1,trpm6
siv_modules:21	1.846	2	0.57431	0.956231	25	25	orange	itgb5,pde4d
siv_modules:17	0.899	1	0.65467	0.956231	14	14	darkolivegreen	ltbp1
siv_modules:18	3.584	3	0.70778	0.956231	93	93	purple	oip5,terf2,hdhd2
siv_modules:6	2.436	2	0.7399	0.956231	29	29	darkturquoise	enpp6,nrg2
siv_modules:28	2.604	2	0.76738	0.956231	41	41	midnightblue	glis3,cdk2ap1
siv_modules:12	1.384	1	0.78402	0.956231	16	16	skyblue	nhsl1
siv_modules:24	1.331	1	0.78795	0.956231	17	17	steelblue	ash1l
siv_modules:10	1.364	1	0.81041	0.956231	13	13	yellowgreen	sorbs2
siv_modules:16	1.55	1	0.81645	0.956231	26	26	grey60	il12rb1
siv_modules:26	3.341	2	0.86132	0.956231	91	92	pink	plekhg1,med9
siv_modules:23	1.929	1	0.86819	0.956231	58	58	salmon	dusp5
siv_modules:19	3.703	2	0.91329	0.956231	36	36	lightgreen	lrg1,hs3st2
siv_modules:29	6.734	4	0.91495	0.956231	151	151	yellow	ube4a,zdhhc16,dffb,pcsk6
siv_modules:22	2.185	1	0.92507	0.956231	18	18	white	ptprd
siv_modules:2	19.048	14	0.92604	0.956231	347	347	turquoise	baiap2,scarb1,fhod1,rabggtb,clec4a,ca1,slc24a3,ripk1,arhgef10,bnip1,bank1,pde2a,ogfrl1,arrdc2
siv_modules:8	4.026	2	0.94838	0.956231	33	33	royalblue	edil3,dst
siv_modules:32	7.741	3	0.98992	0.959602	149	149	blue	coro6,b4galt2,tmem63a
